# Supplementary material for: Tumor-specific CD4+ T cells develop cytotoxic activity and eliminate virus-induced tumor cells in the absence of regulatory T cells
Source: Springer Nature journal article supplement (doi:10.1007/s00262-012-1329-y), 2012-08-13
Supplement: MOESM1 [file 8232162]

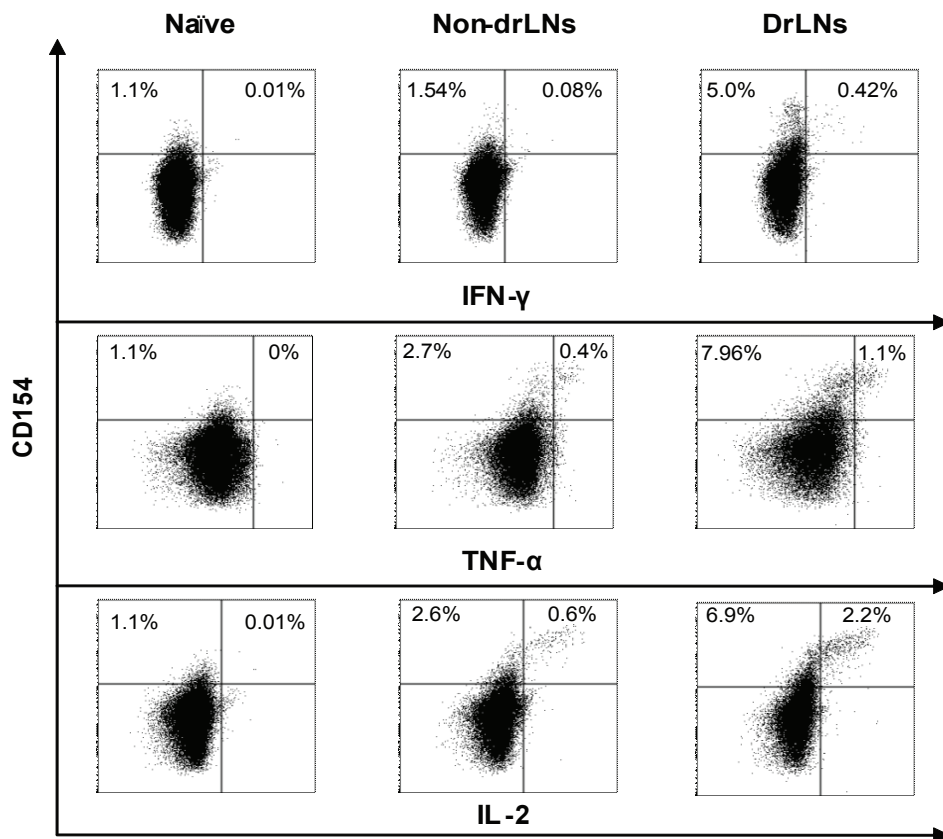

**Supplementary figure S1 Cytokines producing by CD4<sup>+</sup> T cells** B6 mice were inoculated s.c. with  $1 \times 10^7$  FBL-3 cells. At different time points ptc lymphocytes from lymph nodes were isolated and investigated. Representative dot plots of cytokine producing CD4<sup>+</sup>CD154<sup>+</sup> at day 6 ptc in lymph nodes are shown.

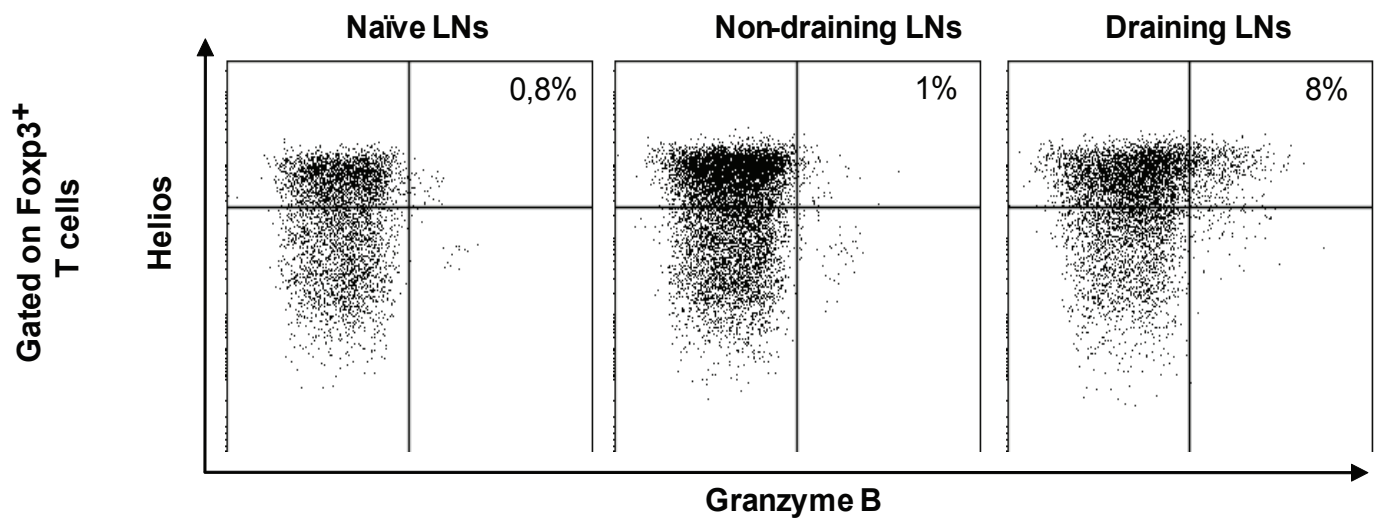

**Supplementary figure S2 Granzyme B producing Tregs in lymph nodes** B6 mice were inoculated s.c. with  $1 \times 10^7$  FBL-3 cells on day 0. Representative FACS analysis of GzmB and Helios expression by Foxp3<sup>+</sup>CD4<sup>+</sup> T cells in lymph nodes at day 6 post tumor inoculation is shown.

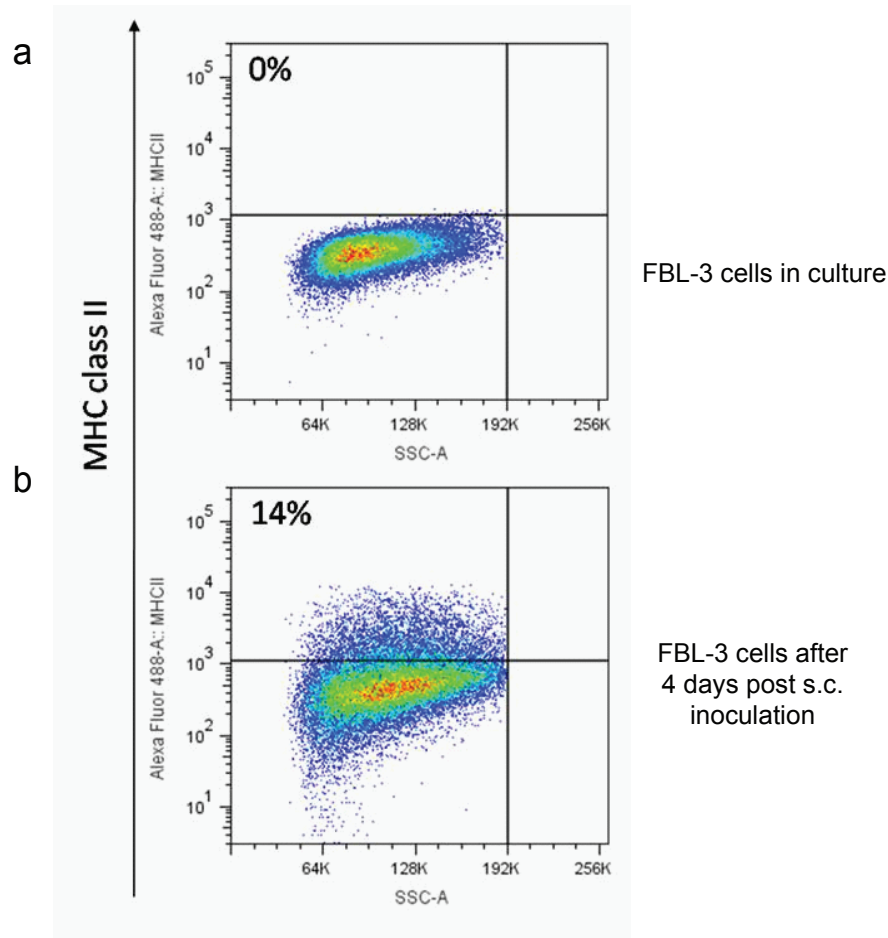

**Supplementary figure S3 Expression of MHC class II molecules on FBL-3 cells**  
 Representative dot plots on MHC class II expression on FBL-3 cells. (a) Staining of FBL-3 cells from *in vitro* cell cultures (in RPMI medium). (b) FBL-3 cells taken directly *ex vivo* from the tumor of CD45.1 tumor-bearing mice. CD45.1 mice were challenged s.c. with  $1 \times 10^7$  FBL-3 cells on day 0. On day 4 ptc mice were sacrificed and tumors were extracted. Expression of MHC class II molecule on the CD45.1 negative cell population (FBL-3 cells) was determined.
